# Supplementary material
Source: Springer Nature journal article supplement (https://www.springermedizin.de/resource/supplementary/12958_2013_1214_MOESM5_ESM.pdf/9567064)

## embryos with ectopic PGCs

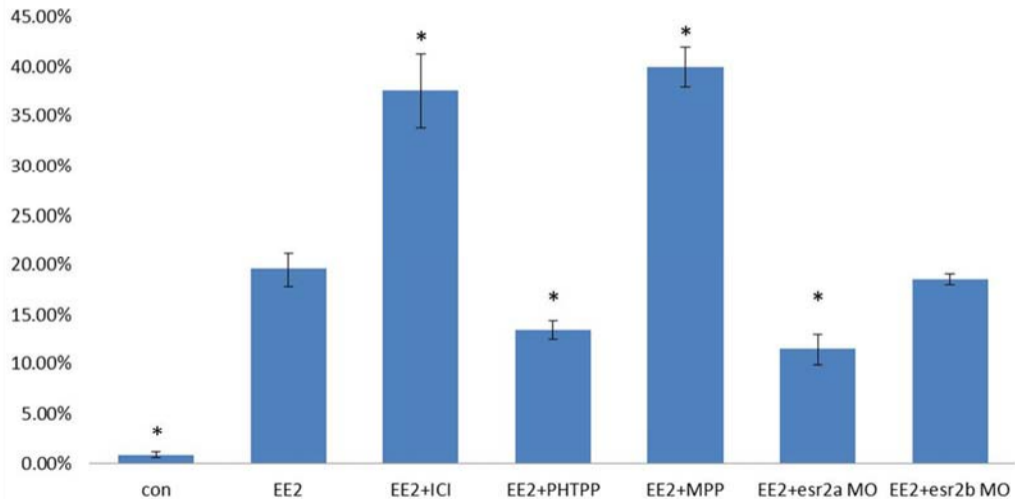

Supplement: MOESM5 [file 9567064]
